# Supplementary material for: Exploring Partial Structural Disorder in Anhydrous Paraxanthine through Combined Experiment, Solid-State Computational Modelling, and Molecular Docking
Source: MDPI journal article supplement (doi:10.3390/pr11092740), 2023-09-14
Supplement: s1 [file s1]

## Supplementary data:

### Exploring Partial Structural Disorder in Anhydrous Paraxanthine through Combined Experiment, Solid-State Computational Modelling, and Molecular Docking

J.N.Latosińska, M.Latosińska, J.Seliger, V. Žagar

**Table S1.** The  $^{14}\text{N}$  NQR parameters for PX calculated theoretically at the GGA/RPBE level with TS DFT-D correction.

| Structure     | Site                 | $\nu_+$ [MHz] | $\nu_-$ [MHz] | $\nu_0$ [MHz] | $e^2qQ/h$ [MHz] | $\eta$ | s, $r^2$ ,<br>intercept,<br>slope |
|---------------|----------------------|---------------|---------------|---------------|-----------------|--------|-----------------------------------|
| 150K<br>X-ray | >N(1)CH <sub>3</sub> | 2.692         | 2.535         | 0.157         | -3.485          | 0.09   | 0.329                             |
|               | >N(3)H               | 2.913         | 1.735         | 1.178         | -3.099          | 0.76   | 0.967                             |
|               | >N(7)CH <sub>3</sub> | 2.020         | 1.721         | 0.299         | -2.494          | 0.24   | 0.069                             |
|               | -N(9)=               | 2.833         | 2.365         | 0.468         | -3.465          | 0.27   | 0.980                             |

**Table S2.** The  $^{14}\text{N}$  NQR parameters for PX calculated theoretically at the m-GGA/RSCAN level.

| Structure                                     | Site                 | $\nu_+$ [MHz] | $\nu_-$ [MHz] | $\nu_0$ [MHz] | $e^2qQ/h$ [MHz] | $\eta$ | s, $r^2$ ,<br>intercept,<br>slope |
|-----------------------------------------------|----------------------|---------------|---------------|---------------|-----------------|--------|-----------------------------------|
| 150K<br>X-ray                                 | >N(1)CH <sub>3</sub> | 2.733         | 2.523         | 0.210         | -3.504          | 0.12   | 0.430                             |
|                                               | >N(3)H               | 2.934         | 1.686         | 1.247         | -3.080          | 0.81   | 0.958                             |
|                                               | >N(7)CH <sub>3</sub> | 1.970         | 1.667         | 0.303         | -2.425          | 0.25   | 0.071                             |
|                                               | -N(9)=               | 2.916         | 2.484         | 0.432         | -3.600          | 0.24   | 0.989                             |
| 150K<br>protons<br>optimised                  | >N(1)CH <sub>3</sub> | 2.526         | 2.347         | 0.179         | -3.249          | 0.11   | 0.036                             |
|                                               | >N(3)H               | 2.564         | 1.870         | 0.695         | -2.956          | 0.47   | 0.996                             |
|                                               | >N(7)CH <sub>3</sub> | 1.924         | 1.606         | 0.318         | -2.353          | 0.27   | 0.012                             |
|                                               | -N(9)=               | 2.745         | 2.276         | 0.469         | -3.347          | 0.28   | 0.945                             |
| 150K<br>full<br>optimisation                  | >N(1)CH <sub>3</sub> | 2.445         | 2.256         | 0.188         | -3.134          | 0.12   | 0.265                             |
|                                               | >N(3)H               | 2.472         | 1.569         | 0.902         | -2.694          | 0.67   | 0.969                             |
|                                               | >N(7)CH <sub>3</sub> | 1.866         | 1.579         | 0.287         | -2.296          | 0.25   | 0.032                             |
|                                               | -N(9)=               | 2.819         | 2.401         | 0.418         | -3.480          | 0.24   | 0.918                             |
| RT<br>ABC<br>protons<br>optimised             | >N(1)CH <sub>3</sub> | 2.42          | 2.234         | 0.186         | -3.103          | 0.12   | 0.067                             |
|                                               | >N(3)H               | 2.464         | 1.499         | 0.964         | -2.642          | 0.73   | 0.994                             |
|                                               | >N(7)CH <sub>3</sub> | 1.84          | 1.578         | 0.262         | -2.279          | 0.23   | -0.044                            |
|                                               | -N(9)=               | 2.824         | 2.405         | 0.418         | -3.486          | 0.24   | 1.036                             |
| RT<br>DEF<br>protons<br>optimised             | >N(1)CH <sub>3</sub> | 2.462         | 2.272         | 0.189         | -3.156          | 0.12   | 0.294                             |
|                                               | >N(3)H               | 2.464         | 1.543         | 0.921         | -2.671          | 0.69   | 0.967                             |
|                                               | >N(7)CH <sub>3</sub> | 1.875         | 1.597         | 0.278         | -2.315          | 0.24   | 0.031                             |
|                                               | -N(9)=               | 2.802         | 2.403         | 0.399         | -3.47           | 0.23   | 0.919                             |
| RT ABCDEF<br>averaged<br>protons<br>optimised | >N(1)CH <sub>3</sub> | 2.441         | 2.253         | 0.188         | -3.129          | 0.12   | 0.321                             |
|                                               | >N(3)H               | 2.464         | 1.521         | 0.943         | -2.656          | 0.71   | 0.964                             |
|                                               | >N(7)CH <sub>3</sub> | 1.858         | 1.588         | 0.270         | -2.297          | 0.24   | 0.035                             |
|                                               | -N(9)=               | 2.813         | 2.404         | 0.409         | -3.478          | 0.24   | 0.914                             |
| direct<br>disorder<br>protons<br>optimised    | >N(1)CH <sub>3</sub> | 2.903         | 2.716         | 0.187         | -3.746          | 0.10   | 0.813                             |
|                                               | >N(3)H               | 2.982         | 1.752         | 1.231         | -3.156          | 0.78   | 0.821                             |
|                                               | >N(7)CH <sub>3</sub> | 4.829         | 2.897         | 1.932         | -5.151          | 0.75   | 1.039                             |
|                                               | -N(9)=               | 2.578         | 2.226         | 0.352         | -3.203          | 0.22   | 0.372                             |

**Table S3.** Topological parameters describing the interactions in PX (electron density at bond critical point, BCP, ( $\rho_{\text{BCP}}(\mathbf{r})$ ), its Laplacian ( $\Delta\rho_{\text{BCP}}(\mathbf{r})$ ), the potential electron energy density ( $V_{\text{BCP}}(\mathbf{r})$ ), the kinetic electron energy density ( $G_{\text{BCP}}(\mathbf{r})$ ) and the total electron energy density ( $H_{\text{BCP}}(\mathbf{r})$ ) calculated at the M062X/6-311+G\*\* level.

| Type    | Proton donor group  | Nature            | Contact      | $\rho_{\text{BCP}}(\mathbf{r})$ | $\Delta\rho_{\text{BCP}}(\mathbf{r})$ | $V_{\text{BCP}}[\text{a.u.}]$ | $G_{\text{BCP}}[\text{a.u.}]$ | $\lambda_2[\text{a.u.}]$ |
|---------|---------------------|-------------------|--------------|---------------------------------|---------------------------------------|-------------------------------|-------------------------------|--------------------------|
| intra   | N(1)CH <sub>3</sub> | HB, electrostatic | CH...O(6)    | 0.019415                        | 0.082248                              | -0.015919                     | 0.018240                      | -0.008415                |
| inter   | N(3)H               | HB, electrostatic | N(3)H...O(2) | 0.032732                        | 0.111786                              | -0.025676                     | 0.026811                      | -0.045682                |
| inter   | N(3)H               | HB, electrostatic | N(3)H...O(2) | 0.033009                        | 0.109698                              | -0.025494                     | 0.026459                      | -0.046151                |
| inter   | N(1)CH <sub>3</sub> | HB, electrostatic | CH...N(9)    | 0.011137                        | 0.034085                              | -0.006972                     | 0.007747                      | -0.010319                |
| inter   | N(1)CH <sub>3</sub> | HB, electrostatic | CH...N(9)    | 0.01114                         | 0.034082                              | -0.006975                     | 0.007748                      | -0.010321                |
| contact | -                   | van der Waals     | N(7)...O(6)  | 0.006256                        | 0.026387                              | -0.00435                      | 0.005473                      | -0.002838                |
| inter   | N(7)CH <sub>3</sub> | HB, electrostatic | CH...O(6)    | 0.006207                        | 0.026292                              | -0.004292                     | 0.005433                      | -0.002806                |
| inter   | N(7)CH <sub>3</sub> | dispersive        | CH...HC      | 0.005926                        | 0.022961                              | -0.002851                     | 0.004296                      | -0.003728                |
| inter   | N(7)CH <sub>3</sub> | dispersive        | CH...HC      | 0.005917                        | 0.022936                              | -0.002843                     | 0.004288                      | -0.003714                |
| inter   | N(1)CH <sub>3</sub> | HB, electrostatic | CH...O(2)    | 0.005584                        | 0.021925                              | -0.003471                     | 0.004476                      | -0.004292                |
| inter   | N(7)CH <sub>3</sub> | HB, electrostatic | CH...N(9)    | 0.005831                        | 0.020395                              | -0.003269                     | 0.004184                      | -0.002005                |
| inter   | N(1)CH <sub>3</sub> | HB, electrostatic | CH...O(6)    | 0.003243                        | 0.013167                              | -0.001731                     | 0.002511                      | -0.002214                |
| inter   | N(1)CH <sub>3</sub> | dispersive        | CH...HC      | 0.00219                         | 0.008072                              | -0.000829                     | 0.001424                      | -0.000435                |
| inter   | C(8)H               | HB, electrostatic | C(8)H...O(6) | 0.010951                        | 0.033945                              | -0.008072                     | 0.008279                      | -0.010990                |
| intra   | N(1)CH <sub>3</sub> | HB, electrostatic | CH...O(6)    | 0.020088                        | 0.08409                               | -0.016395                     | 0.018709                      | -0.009727                |
| inter   | N(3)H               | HB, electrostatic | N(3)H...O(2) | 0.03101                         | 0.105998                              | -0.024489                     | 0.025494                      | -0.042313                |
| inter   | N(3)H               | HB, electrostatic | N(3)H...O(2) | 0.031257                        | 0.104175                              | -0.024316                     | 0.02518                       | -0.042684                |
| inter   | N(1)CH <sub>3</sub> | HB, electrostatic | CH...N(9)    | 0.008666                        | 0.027768                              | -0.005076                     | 0.006009                      | -0.007122                |
| inter   | N(1)CH <sub>3</sub> | HB, electrostatic | CH...N(9)    | 0.008664                        | 0.02776                               | -0.005075                     | 0.006007                      | -0.007122                |
| inter   | N(1)CH <sub>3</sub> | HB, electrostatic | CH...O(6)    | 0.005983                        | 0.02548                               | -0.004125                     | 0.005248                      | -0.002449                |
| inter   | N(7)CH <sub>3</sub> | HB, electrostatic | CH...O(6)    | 0.005934                        | 0.025417                              | -0.004073                     | 0.005214                      | -0.002442                |
| inter   | N(7)CH <sub>3</sub> | dispersive        | CH...HC      | 0.00563                         | 0.021691                              | -0.002668                     | 0.004045                      | -0.003515                |
| inter   | N(7)CH <sub>3</sub> | dispersive        | CH...HC      | 0.005634                        | 0.021685                              | -0.002675                     | 0.004048                      | -0.003523                |
| inter   | N(7)CH <sub>3</sub> | HB, electrostatic | CH...N(9)    | 0.005954                        | 0.020752                              | -0.00335                      | 0.004269                      | -0.003306                |
| inter   | N(1)CH <sub>3</sub> | HB, electrostatic | CH...O(2)    | 0.004742                        | 0.018976                              | -0.00284                      | 0.003792                      | -0.003677                |
| inter   | N(1)CH <sub>3</sub> | HB, electrostatic | CH...O(2)    | 0.002830                        | 0.011782                              | -0.001444                     | 0.002195                      | -0.001819                |
| inter   | C(8)H               | HB, electrostatic | C(8)H...O(6) | 0.00949                         | 0.030082                              | -0.006777                     | 0.007157                      | -0.009274                |
| intra   | N(1)CH <sub>3</sub> | HB, electrostatic | CH...O(6)    | 0.02005                         | 0.084041                              | -0.01635                      | 0.01868                       | -0.009608                |
| intra   | N(7)CH <sub>3</sub> | HB, electrostatic | CH...O(6)    | 0.012975                        | 0.041747                              | -0.00945                      | 0.009943                      | -0.011783                |
| inter   | N(3)H               | HB, electrostatic | N(3)H...O(2) | 0.031117                        | 0.106289                              | -0.024555                     | 0.025564                      | -0.042496                |
| inter   | N(3)H               | HB, electrostatic | N(3)H...O(2) | 0.031367                        | 0.104414                              | -0.024377                     | 0.02524                       | -0.042879                |
| inter   | N(7)CH <sub>3</sub> | dispersive        | CH...HC      | 0.020191                        | 0.059867                              | -0.015644                     | 0.015305                      | -0.026689                |
| inter   | N(7)CH <sub>3</sub> | HB, electrostatic | CH...N(9)    | 0.011148                        | 0.035763                              | -0.00735                      | 0.008146                      | -0.009782                |
| inter   | N(1)CH <sub>3</sub> | HB, electrostatic | CH...N(9)    | 0.00866                         | 0.027753                              | -0.005071                     | 0.006005                      | -0.007119                |
| inter   | N(1)CH <sub>3</sub> | HB, electrostatic | CH...N(9)    | 0.008659                        | 0.027747                              | -0.00507                      | 0.006003                      | -0.007119                |
| inter   | N(7)CH <sub>3</sub> | HB, electrostatic | CH...O(6)    | 0.006086                        | 0.025919                              | -0.004206                     | 0.005343                      | -0.002403                |
| inter   | N(7)CH <sub>3</sub> | HB, electrostatic | CH...O(6)    | 0.006019                        | 0.025852                              | -0.00414                      | 0.005301                      | -0.002391                |
| inter   | N(1)CH <sub>3</sub> | HB, electrostatic | CH...O(2)    | 0.004743                        | 0.018973                              | -0.00284                      | 0.003791                      | -0.003675                |
| inter   | N(1)CH <sub>3</sub> | HB, electrostatic | CH...O(6)    | 0.002808                        | 0.011705                              | -0.001431                     | 0.002179                      | -0.001875                |
| inter   | N(1)CH <sub>3</sub> | dispersive        | CH...HC      | 0.002367                        | 0.008792                              | -0.000886                     | 0.001542                      | -0.000863                |
| inter   | C(8)H               | HB, electrostatic | C(8)H...O(6) | 0.009484                        | 0.030130                              | -0.006781                     | 0.007157                      | -0.009274                |

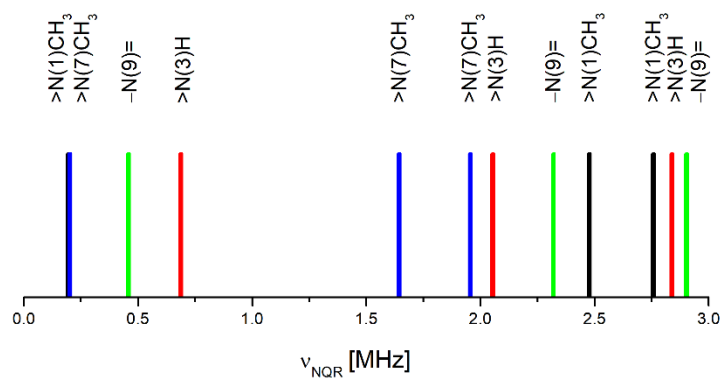

a)

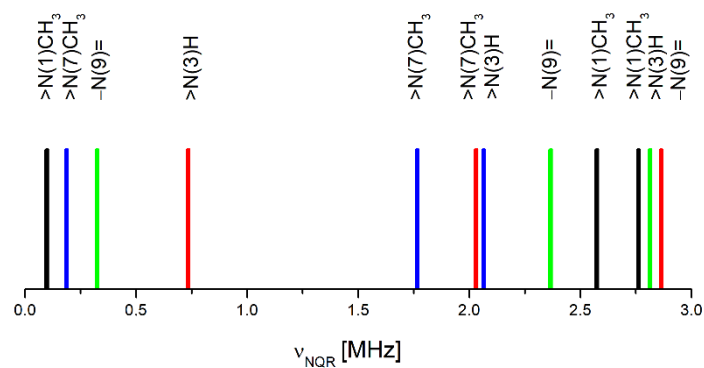

b)

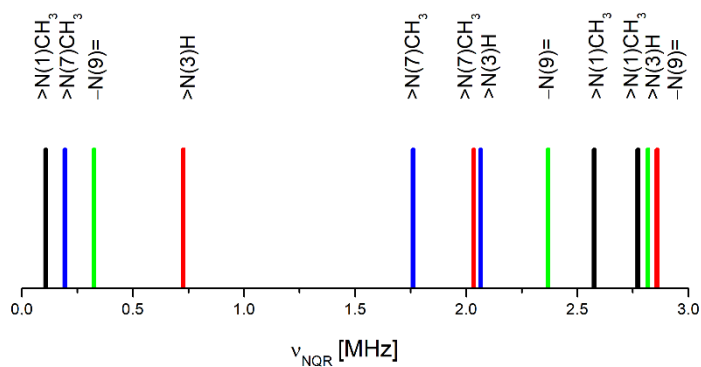

c)

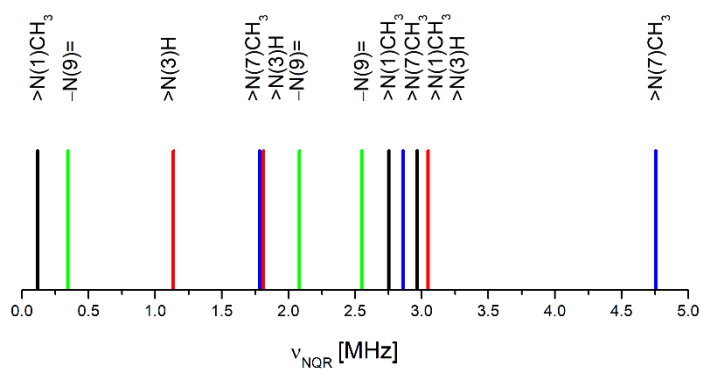

d)

Figure S1. The  $^{14}\text{N}$  NQR spectrum in PX: experimental a) and simulated at the GGA/RBPE of theory b) LT, c) averaged model at RT (RT ABCDEF) and d) direct disorder model.

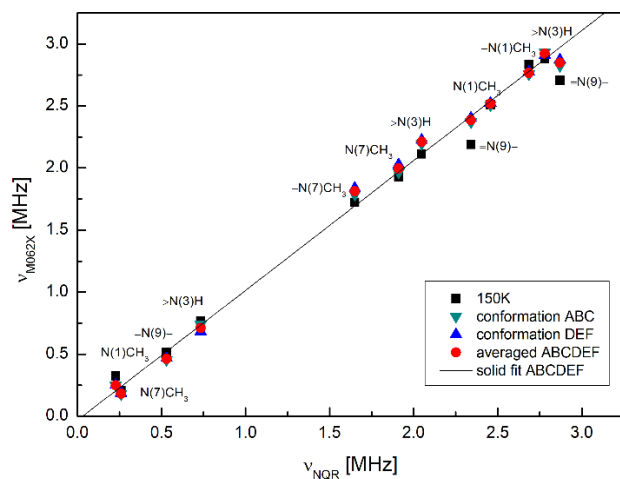

Figure S2. The correlation between the NQR frequencies experimental and calculated at M062X level.

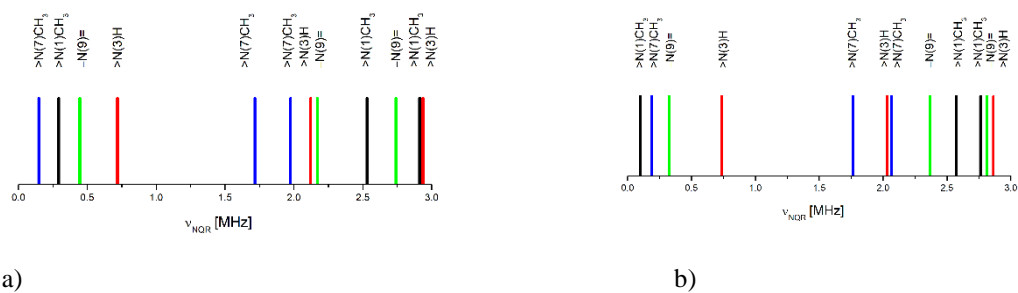

Figure S3 The resonance line positions in NQR spectrum simulated at the M062X level: a) cluster, LT, b) cluster, averaged model RT (RT ABCDEF).

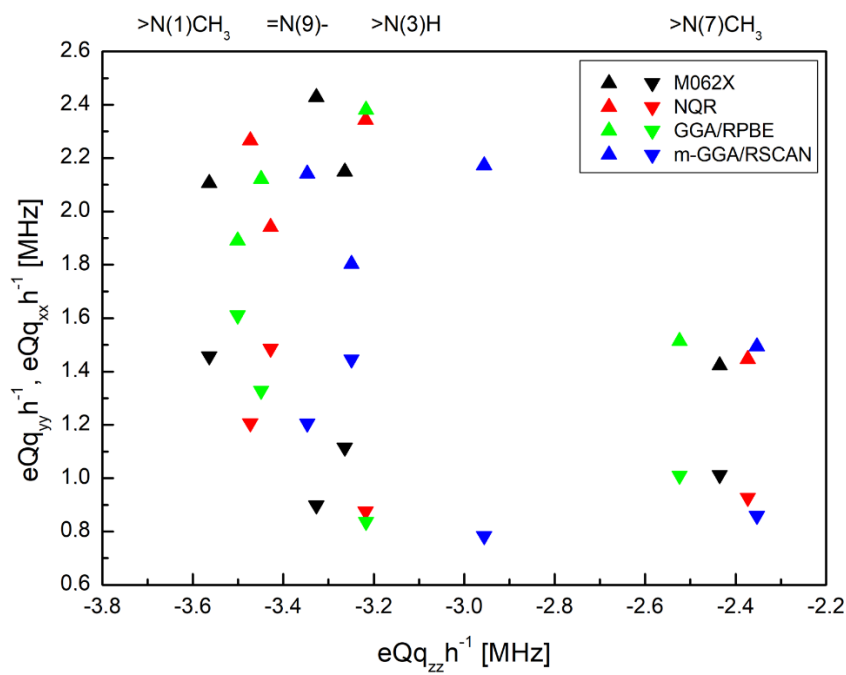

Figure S4. The correlation between the EFG tensor components.

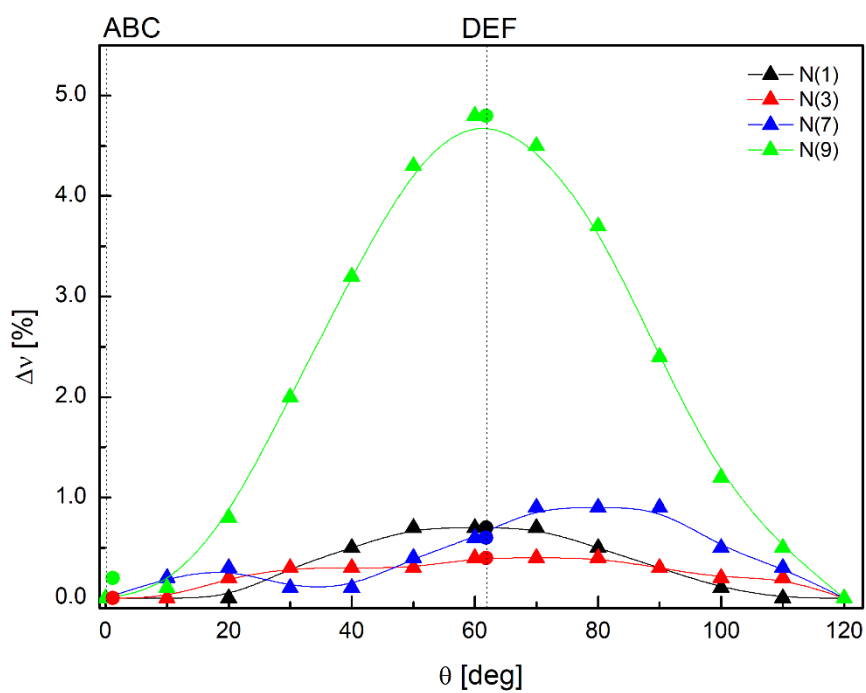

Figure S5. The changes in the FWHM of the resonance line upon the rotation of the methyl group at N(7).

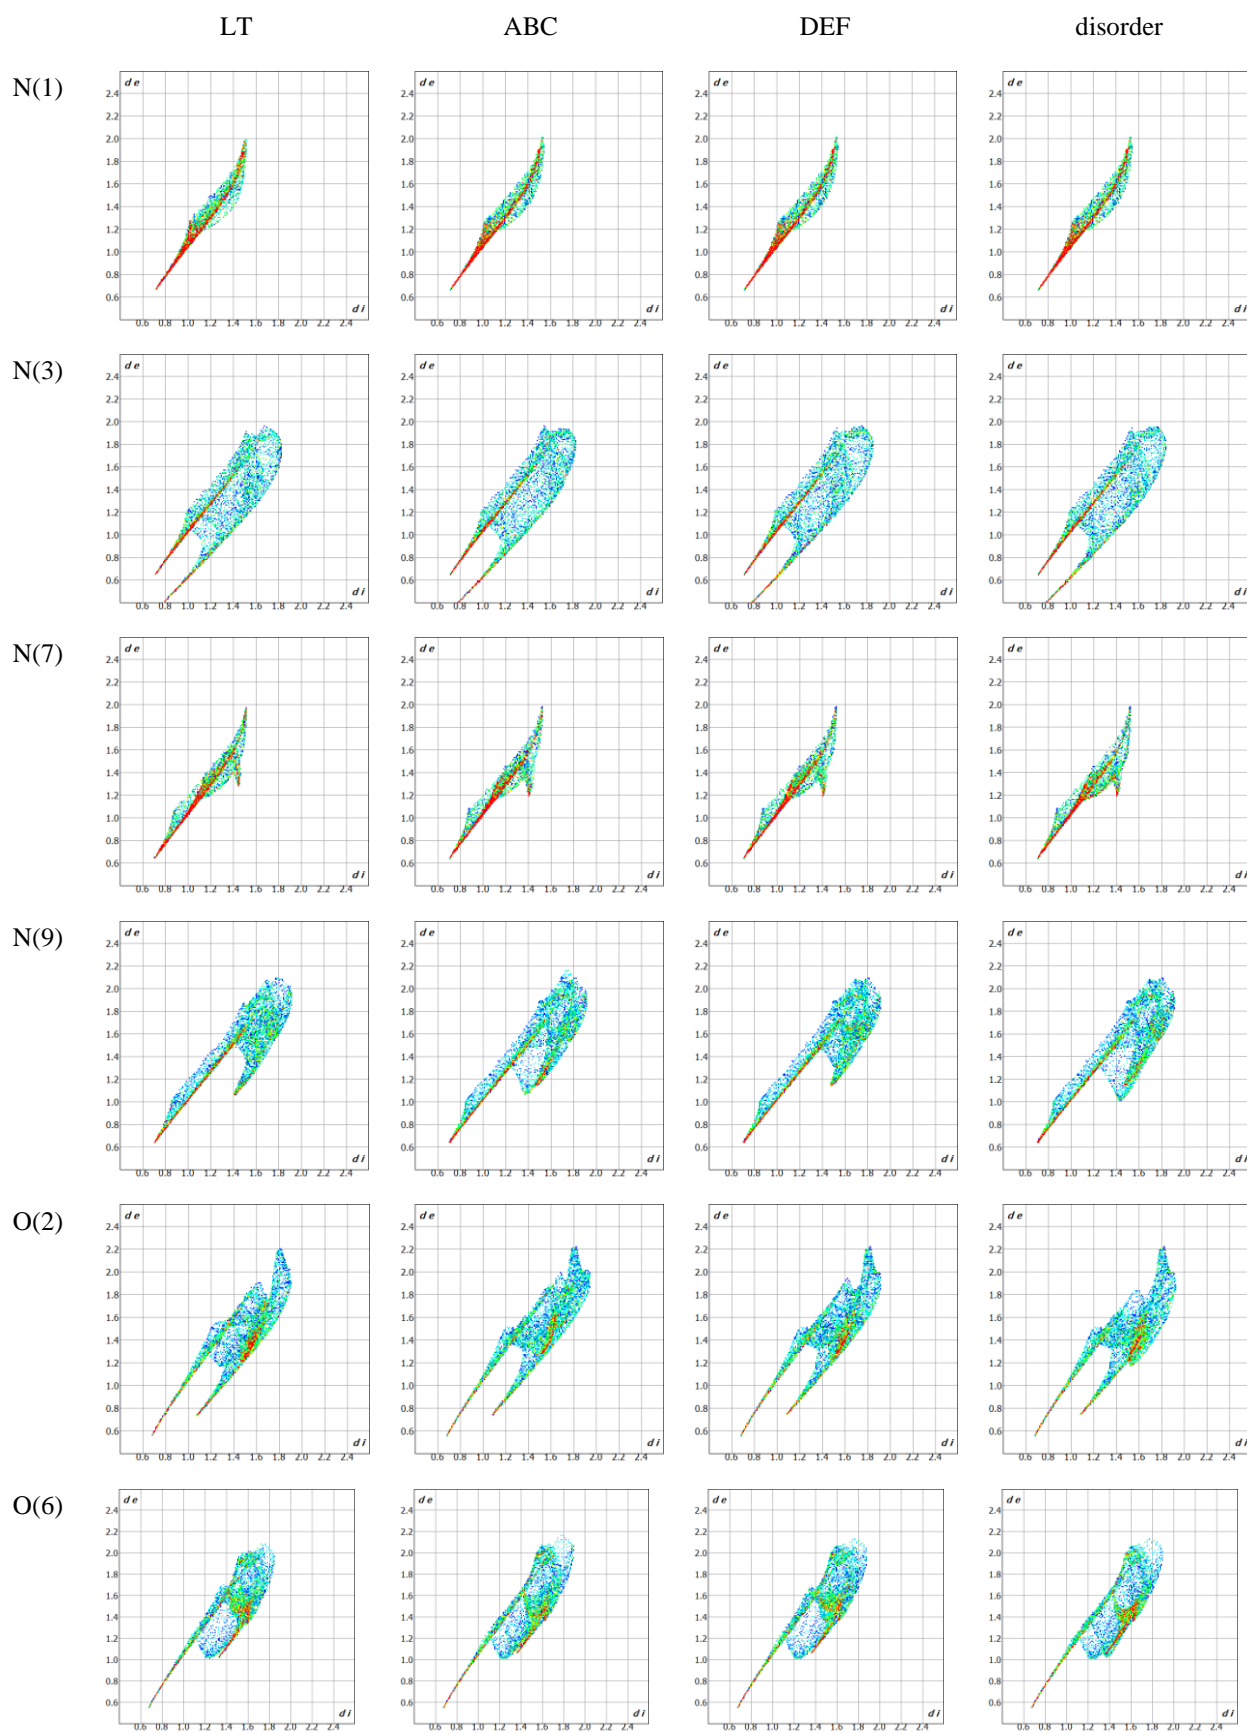

Figure S6. Local 2D molecular fingerprinting of the interactions pattern in PX (protons optimized).

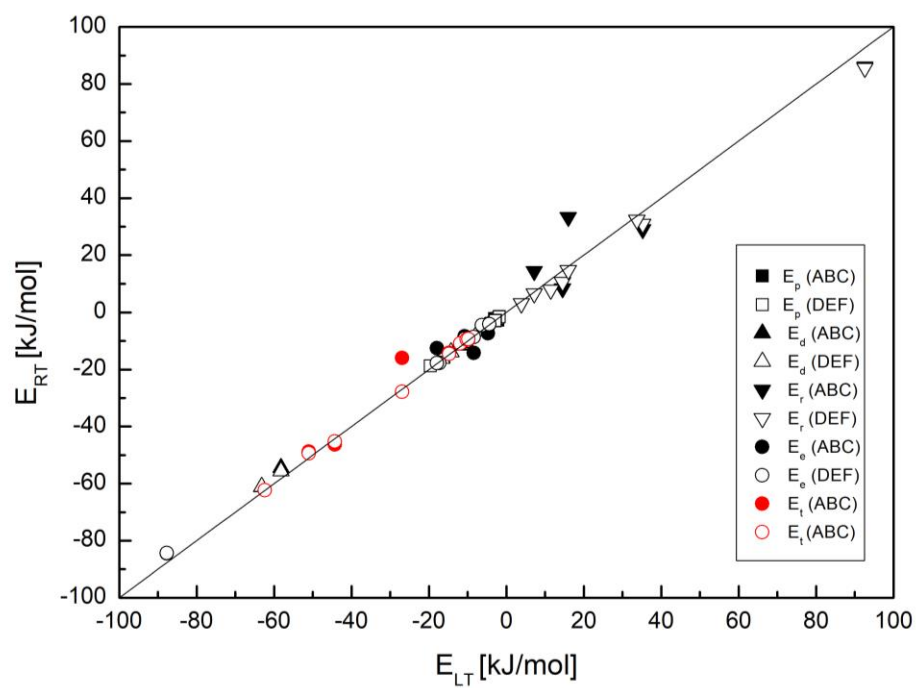

Figure S7. The correlation between the total energy and its components (data from Table 6) for LT, RT ABC and RT DEF structures (solid line  $E_{RT}=E_{LT}$ ).

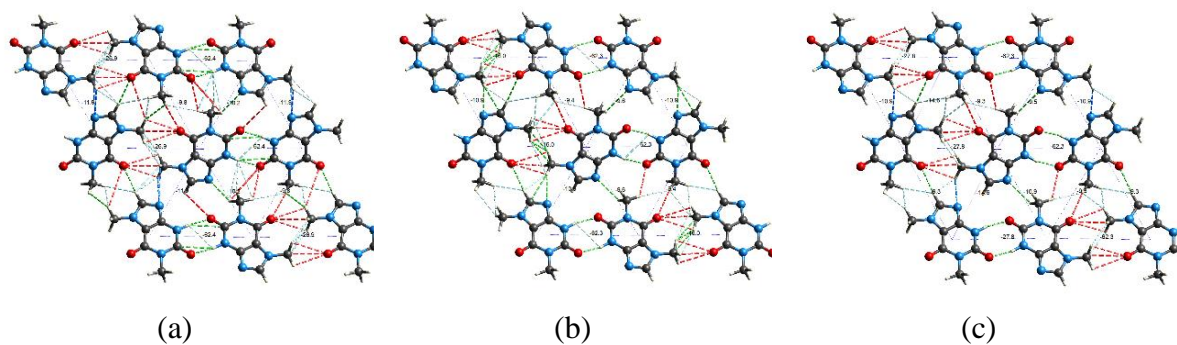

Figure S8. Interactions pattern in the PX structure (along the a-axis): (a) LT, (b) RT ABC and (c) RT DEF.
